# Supplementary material for: Development of an Artificial 3D Liver Phantom for Analysis of Radiotherapeutic Effects In Vitro
Source: MDPI journal article supplement (doi:10.3390/app122110867), 2022-10-26
Supplement: s1 [file s1]

Article

# Development of an artificial 3D liver phantom for analysis of radiotherapeutic effects *in vitro*

Christina Stengl <sup>1,2,3</sup>, Shahrouz Ghafoory <sup>2</sup>, Artur Weidner <sup>1,3</sup>, Brennah Murphy <sup>4</sup> and Stefan Wölfl <sup>2,\*</sup>

## Supplementary File

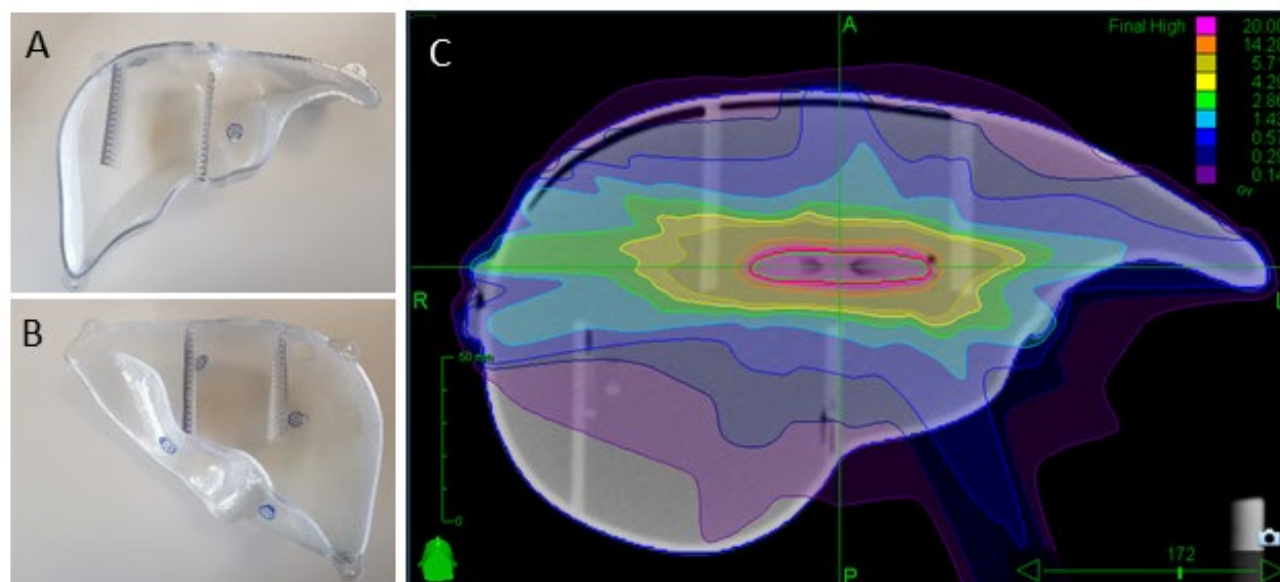

**Supplementary Figure S1.** Picture of the liver phantom from inside with beekleys on the surface and inserts for MCs (A,B). Monte Carlo simulation of liver treatment plan from caudal with purple = 0.14 Gy, green = 2.86 Gy and pink = 20.00 Gy (C).
